# Supplementary material for: Emergency Department Use and Inpatient Admissions and Costs Among Adolescents With Deliberate Self-Harm: A Five-Year Follow-Up Study
Source: Atypon-hosted journal article supplement (doi:10.1176/appi.ps.201900153), 2019-10-02
Supplement: appi.ps.201900153.ds001.pdf [file appi.ps.201900153.ds001.pdf]

## Supplement

**Supplement Table 1. Full model results for analyses of subsequent total emergency department utilization among self-harm vs. general control patients.**

|                                                   | IRR <sub>adj</sub> | 95% CI     |
|---------------------------------------------------|--------------------|------------|
| Self-harm patient group                           | 1.39               | (1.3, 1.4) |
| Age                                               | 1.03               | (1.0, 1.0) |
| Race/ethnicity (ref: non-Hispanic White)          |                    |            |
| Non-Hispanic Black                                | 1.22               | (1.2, 1.3) |
| Hispanic                                          | 0.94               | (0.9, 1.0) |
| Asian/Pacific Islander                            | 0.49               | (0.4, 0.6) |
| Other                                             | 0.86               | (0.8, 0.9) |
| Insurance type (ref: private)                     |                    |            |
| Medicaid                                          | 1.49               | (1.4, 1.5) |
| Self-pay                                          | 1.23               | (1.1, 1.3) |
| Other                                             | 1.32               | (1.2, 1.4) |
| Disposition at index visit (ref: discharged home) |                    |            |
| Admitted                                          | 1.05               | (1.0, 1.1) |
| Other                                             | 1.09               | (1.0, 1.2) |
| Patient ED utilization, 2006-09                   |                    |            |
| Total visits, mean $\pm$ SD                       | 1.15               | (1.1, 1.2) |
| Any mental health visit                           | 1.34               | (1.3, 1.4) |
| Any substance use visit                           | 1.07               | (0.9, 1.2) |
| Dispersion parameter                              | 1.20               | (1.2, 1.2) |

**Supplement Table 2. Full model results for analyses of subsequent emergency department utilization for psychiatric complaints among self-harm vs. general control patients.**

|                                                   | IRR <sub>adj</sub> | 95% CI     |
|---------------------------------------------------|--------------------|------------|
| Self-harm patient group                           | 3.64               | (3.1, 4.2) |
| Age                                               | 1.02               | (1.0, 1.1) |
| Race/ethnicity (ref: non-Hispanic White)          |                    |            |
| Non-Hispanic Black                                | 0.94               | (0.8, 1.1) |
| Hispanic                                          | 0.85               | (0.7, 1.0) |
| Asian/Pacific Islander                            | 0.36               | (0.3, 0.5) |
| Other                                             | 0.82               | (0.6, 1.1) |
| Insurance type (ref: private)                     |                    |            |
| Medicaid                                          | 1.25               | (1.1, 1.4) |
| Self-pay                                          | 0.97               | (0.8, 1.1) |
| Other                                             | 0.87               | (0.7, 1.1) |
| Disposition at index visit (ref: discharged home) |                    |            |
| Admitted                                          | 1.76               | (1.5, 2.0) |
| Other                                             | 1.14               | (0.9, 1.5) |
| Patient ED utilization, 2006-09                   |                    |            |
| Total visits, mean $\pm$ SD                       | 1.06               | (1.0, 1.1) |
| Any mental health visit                           | 2.72               | (2.3, 3.2) |
| Any substance use visit                           | 1.74               | (1.3, 2.3) |
| Dispersion parameter                              | 5.42               | (5.0, 5.8) |

**Supplement Table 3. Full model results for analyses of subsequent emergency**

**department utilization for non-psychiatric complaints among self-harm vs. general control patients.**

|                                                   | IRR <sub>adj</sub> | 95% CI     |
|---------------------------------------------------|--------------------|------------|
| Self-harm patient group                           | 1.27               | (1.2, 1.3) |
| Age                                               | 1.03               | (1.0, 1.0) |
| Race/ethnicity (ref: non-Hispanic White)          |                    |            |
| Non-Hispanic Black                                | 1.23               | (1.2, 1.3) |
| Hispanic                                          | 0.94               | (0.9, 1.0) |
| Asian/Pacific Islander                            | 0.50               | (0.4, 0.6) |
| Other                                             | 0.86               | (0.8, 0.9) |
| Insurance type (ref: private)                     |                    |            |
| Medicaid                                          | 1.52               | (1.5, 1.5) |
| Self-pay                                          | 1.25               | (1.2, 1.3) |
| Other                                             | 1.36               | (1.2, 1.5) |
| Disposition at index visit (ref: discharged home) |                    |            |
| Admitted                                          | 0.99               | (0.9, 1.0) |
| Other                                             | 1.09               | (1.0, 1.2) |
| Patient ED utilization, 2006-09                   |                    |            |
| Total visits, mean ± SD                           | 1.15               | (1.1, 1.1) |
| Any mental health visit                           | 1.26               | (1.2, 1.3) |
| Any substance use visit                           | 1.04               | (0.9, 1.1) |
| Dispersion parameter                              | 1.19               | (1.2, 1.3) |

**Supplement Table 4. Full model results for analyses of subsequent total inpatient admissions among self-harm vs. general control patients.**

|                                                   | IRR <sub>adj</sub> | 95% CI     |
|---------------------------------------------------|--------------------|------------|
| Self-harm patient group                           | 1.81               | (1.7, 1.9) |
| Age                                               | 1.06               | (1.0, 1.0) |
| Race/ethnicity (ref: non-Hispanic White)          |                    |            |
| Non-Hispanic Black                                | 1.25               | (1.1, 1.3) |
| Hispanic                                          | 1.09               | (1.0, 1.1) |
| Asian/Pacific Islander                            | 0.63               | (0.5, 0.8) |
| Other                                             | 0.93               | (0.8, 1.1) |
| Insurance type (ref: private)                     |                    |            |
| Medicaid                                          | 1.36               | (1.3, 1.4) |
| Self-pay                                          | 1.05               | (0.9, 1.1) |
| Other                                             | 1.28               | (1.0, 1.3) |
| Disposition at index visit (ref: discharged home) |                    |            |
| Admitted                                          | 1.80               | (1.6, 2.0) |
| Other                                             | 1.35               | (1.1, 1.7) |
| Patient ED utilization, 2006-09                   |                    |            |
| Total visits, mean ± SD                           | 1.08               | (1.1, 1.1) |
| Any mental health visit                           | 1.82               | (1.6, 2.0) |
| Any substance use visit                           | 1.20               | (1.0, 1.4) |
| Dispersion parameter                              | 2.25               | (2.1, 2.3) |

**Supplement Table 5. Full model results for analyses of subsequent inpatient admissions for psychiatric complaints among self-harm vs. general control patients.**

|                                                   | IRR <sub>adi</sub> | 95% CI     |
|---------------------------------------------------|--------------------|------------|
| Self-harm patient group                           | 5.55               | (4.6, 6.6) |
| Age                                               | 0.96               | (0.9, 1.0) |
| Race/ethnicity (ref: non-Hispanic White)          |                    |            |
| Non-Hispanic Black                                | 0.97               | (0.8, 1.2) |
| Hispanic                                          | 0.70               | (0.6, 0.9) |
| Asian/Pacific Islander                            | 0.51               | (0.3, 0.8) |
| Other                                             | 0.69               | (0.5, 1.0) |
| Insurance type (ref: private)                     |                    |            |
| Medicaid                                          | 1.27               | (1.0, 1.5) |
| Self-pay                                          | 1.10               | (0.8, 1.4) |
| Other                                             | 0.82               | (0.6, 1.1) |
| Disposition at index visit (ref: discharged home) |                    |            |
| Admitted                                          | 2.71               | (2.2, 3.2) |
| Other                                             | 1.51               | (1.0, 2.2) |
| Patient ED utilization, 2006-09                   |                    |            |
| Total visits, mean ± SD                           | 1.03               | (1.0, 1.0) |
| Any mental health visit                           | 3.62               | (2.8, 4.6) |
| Any substance use visit                           | 1.73               | (1.2, 2.4) |
| Dispersion parameter                              | 6.89               | (6.2, 7.0) |

**Supplement Table 6. Full model results for analyses of subsequent inpatient admissions for non-psychiatric complaints among self-harm vs. general control patients.**

|                                                   | IRR <sub>adi</sub> | 95% CI     |
|---------------------------------------------------|--------------------|------------|
| Self-harm patient group                           | 1.04               | (0.9, 1.1) |
| Age                                               | 1.10               | (1.1, 1.1) |
| Race/ethnicity (ref: non-Hispanic White)          |                    |            |
| Non-Hispanic Black                                | 1.30               | (1.1, 1.5) |
| Hispanic                                          | 1.24               | (1.1, 1.3) |
| Asian/Pacific Islander                            | 0.67               | (0.5, 0.8) |
| Other                                             | 1.06               | (0.9, 1.2) |
| Insurance type (ref: private)                     |                    |            |
| Medicaid                                          | 1.35               | (1.2, 1.4) |
| Self-pay                                          | 1.04               | (0.9, 1.2) |
| Other                                             | 1.48               | (1.1, 1.9) |
| Disposition at index visit (ref: discharged home) |                    |            |
| Admitted                                          | 1.42               | (1.2, 1.6) |
| Other                                             | 1.25               | (1.0, 1.5) |
| Patient ED utilization, 2006-09                   |                    |            |
| Total visits, mean ± SD                           | 1.09               | (1.1, 1.2) |
| Any mental health visit                           | 1.28               | (1.1, 1.4) |
| Any substance use visit                           | 1.13               | (0.9, 1.3) |
| Dispersion parameter                              | 2.21               | (2.0, 2.2) |

**Supplement Table 7. Full model results for analyses of subsequent total inpatient costs among self-harm vs. general control patients.**

|  | Exp(b) <sup>a</sup> | 95% CI |
|--|---------------------|--------|
|--|---------------------|--------|

|                                                   |      |            |
|---------------------------------------------------|------|------------|
| Self-harm patient group                           | 1.21 | (1.1, 1.3) |
| Age                                               | 1.00 | (1.0, 1.0) |
| Race/ethnicity (ref: non-Hispanic White)          |      |            |
| Non-Hispanic Black                                | 1.13 | (1.0, 1.3) |
| Hispanic                                          | 0.92 | (0.8, 1.0) |
| Asian/Pacific Islander                            | 1.13 | (0.7, 1.8) |
| Other                                             | 0.95 | (0.8, 1.1) |
| Insurance type (ref: private)                     |      |            |
| Medicaid                                          | 1.03 | (0.9, 1.1) |
| Self-pay                                          | 0.92 | (0.8, 1.0) |
| Other                                             | 1.18 | (0.9, 1.5) |
| Disposition at index visit (ref: discharged home) |      |            |
| Admitted                                          | 1.47 | (1.3, 1.6) |
| Other                                             | 1.13 | (0.9, 1.4) |
| Patient ED utilization, 2006-09                   |      |            |
| Total visits, mean ± SD                           | 1.04 | (1.0, 1.0) |
| Any mental health visit                           | 1.42 | (1.2, 1.6) |
| Any substance use visit                           | 1.05 | (0.9, 1.2) |

<sup>a</sup> Exp(b) is interpreted as the multiplicative effect on mean costs associated with being in the self-harm patient group vs. the control patient group.

---

**Supplement Table 8. Full model results for analyses of subsequent inpatient costs for psychiatric complaints among self-harm vs. general control patients.**

---

|                                                   | Exp(b) <sup>a</sup> | 95% CI     |
|---------------------------------------------------|---------------------|------------|
| Self-harm patient group                           | 3.98                | (3.3, 4.7) |
| Age                                               | 0.92                | (0.9, 1.0) |
| Race/ethnicity (ref: non-Hispanic White)          |                     |            |
| Non-Hispanic Black                                | 0.80                | (0.6, 1.0) |
| Hispanic                                          | 0.61                | (0.5, 0.8) |
| Asian/Pacific Islander                            | 0.63                | (0.4, 1.0) |
| Other                                             | 0.77                | (0.5, 1.1) |
| Insurance type (ref: private)                     |                     |            |
| Medicaid                                          | 0.94                | (0.7, 1.1) |
| Self-pay                                          | 1.01                | (0.7, 1.4) |
| Other                                             | 0.70                | (0.5, 1.0) |
| Disposition at index visit (ref: discharged home) |                     |            |
| Admitted                                          | 2.27                | (1.9, 2.7) |
| Other                                             | 1.26                | (0.8, 1.7) |
| Patient ED utilization, 2006-09                   |                     |            |
| Total visits, mean ± SD                           | 1.00                | (1.0, 1.0) |
| Any mental health visit                           | 2.91                | (2.2, 3.7) |
| Any substance use visit                           | 1.63                | (1.2, 2.1) |

<sup>a</sup> Exp(b) is interpreted as the multiplicative effect on mean costs associated with being in the self-harm patient group vs. the control patient group.

---



---

**Supplement Table 9. Full model results for analyses of subsequent inpatient costs for non-psychiatric complaints among self-harm vs. general control patients.**

---

|  | Exp(b) <sup>a</sup> | 95% CI |
|--|---------------------|--------|
|--|---------------------|--------|

---

|                                                   |      |            |
|---------------------------------------------------|------|------------|
| Self-harm patient group                           | 0.70 | (0.6, 0.8) |
| Age                                               | 1.03 | (1.0, 1.0) |
| Race/ethnicity (ref: non-Hispanic White)          |      |            |
| Non-Hispanic Black                                | 1.12 | (0.9, 1.3) |
| Hispanic                                          | 1.00 | (0.9, 1.0) |
| Asian/Pacific Islander                            | 1.25 | (0.7, 2.1) |
| Other                                             | 1.05 | (0.9, 1.2) |
| Insurance type (ref: private)                     |      |            |
| Medicaid                                          | 1.00 | (0.9, 1.1) |
| Self-pay                                          | 0.89 | (0.8, 1.0) |
| Other                                             | 1.44 | (1.0, 2.0) |
| Disposition at index visit (ref: discharged home) |      |            |
| Admitted                                          | 1.14 | (1.0, 1.3) |
| Other                                             | 1.08 | (0.8, 1.4) |
| Patient ED utilization, 2006-09                   |      |            |
| Total visits, mean ± SD                           | 1.05 | (1.0, 1.0) |
| Any mental health visit                           | 1.00 | (0.8, 1.1) |
| Any substance use visit                           | 0.97 | (0.8, 1.2) |

<sup>a</sup> Exp(b) is interpreted as the multiplicative effect on mean costs associated with being in the self-harm patient group vs. the control patient group.

---

**Supplement Table 10. Full model results for analyses of subsequent total emergency department utilization among self-harm vs. psychiatric patients.**

---

|                         | IRR <sub>adj</sub> | 95% CI     |
|-------------------------|--------------------|------------|
| Self-harm patient group | 1.03               | (0.9, 1.1) |

|                                                            |      |              |
|------------------------------------------------------------|------|--------------|
| Age                                                        | 1.04 | (1.03, 1.05) |
| Race/ethnicity (ref: non-Hispanic White)                   |      |              |
| Non-Hispanic Black                                         | 1.22 | (1.1, 1.3)   |
| Hispanic                                                   | 0.88 | (0.8, 0.9)   |
| Asian/Pacific Islander                                     | 0.58 | (0.5, 0.7)   |
| Other                                                      | 0.83 | (0.8, 0.9)   |
| Insurance type (ref: private)                              |      |              |
| Medicaid                                                   | 1.46 | (1.4, 1.5)   |
| Self-pay                                                   | 1.16 | (1.1, 1.2)   |
| Other                                                      | 1.45 | (1.3, 1.6)   |
| Disposition at index visit (ref: discharged home)          |      |              |
| Admitted                                                   | 0.98 | (0.9, 1.0)   |
| Other                                                      | 0.99 | (0.9, 1.1)   |
| Median income in patient ZIP code (ref: \$25,000-\$49,999) |      |              |
| <\$25,000                                                  | 0.88 | (0.8, 0.97)  |
| \$50,000-\$74,999                                          | 1.01 | (0.9, 1.06)  |
| \$75,000-\$99,999                                          | 0.97 | (0.9, 1.1)   |
| ≥\$100,000                                                 | 0.73 | (0.6, 0.9)   |
| Patient ED utilization, 2006-09                            |      |              |
| Total visits, mean ± SD                                    | 1.12 | (1.11, 1.13) |
| Any mental health visit                                    | 1.29 | (1.2, 1.4)   |
| Any substance use visit                                    | 1.06 | (0.9, 1.2)   |
| Dispersion parameter                                       | 1.23 | (1.2, 1.3)   |

**Supplement Table 11. Full model results for analyses of subsequent emergency department utilization for psychiatric complaints among self-harm vs. psychiatric patients.**

|                         | IRR <sub>adj</sub> | 95% CI     |
|-------------------------|--------------------|------------|
| Self-harm patient group | 0.87               | (0.8, 0.9) |
| Age                     | 1.04               | (1.0, 1.0) |

|                                                            |      |            |
|------------------------------------------------------------|------|------------|
| Race/ethnicity (ref: non-Hispanic White)                   |      |            |
| Non-Hispanic Black                                         | 1.29 | (1.1, 1.5) |
| Hispanic                                                   | 0.80 | (0.7, 0.9) |
| Asian/Pacific Islander                                     | 0.84 | (0.7, 1.1) |
| Other                                                      | 0.92 | (0.8, 1.1) |
| Insurance type (ref: private)                              |      |            |
| Medicaid                                                   | 1.40 | (1.3, 1.5) |
| Self-pay                                                   | 1.24 | (1.1, 1.4) |
| Other                                                      | 1.15 | (0.9, 1.4) |
| Disposition at index visit (ref: discharged home)          |      |            |
| Admitted                                                   | 1.61 | (1.5, 1.7) |
| Other                                                      | 1.13 | (0.9, 1.3) |
| Median income in patient ZIP code (ref: \$25,000-\$49,999) |      |            |
| <\$25,000                                                  | 1.06 | (0.9, 1.2) |
| \$50,000-\$74,999                                          | 1.09 | (1.0, 1.0) |
| \$75,000-\$99,999                                          | 1.19 | (1.0, 1.3) |
| ≥\$100,000                                                 | 0.74 | (0.5, 1.0) |
| Patient ED utilization, 2006-09                            |      |            |
| Total visits, mean ± SD                                    | 1.04 | (1.0, 1.0) |
| Any mental health visit                                    | 2.26 | (2.1, 2.4) |
| Any substance use visit                                    | 1.44 | (1.2, 1.4) |
| Dispersion parameter                                       | 3.71 | (3.5, 3.8) |

---

**Supplement Table 12. Full model results for analyses of subsequent emergency department utilization for non-psychiatric complaints among self-harm vs. psychiatric patients.**

---

|                                          | IRR <sub>adi</sub> | 95% CI     |
|------------------------------------------|--------------------|------------|
| Self-harm patient group                  | 1.08               | (1.0, 1.1) |
| Age                                      | 1.05               | (1.0, 1.0) |
| Race/ethnicity (ref: non-Hispanic White) |                    |            |

|                                                            |      |            |
|------------------------------------------------------------|------|------------|
| Non-Hispanic Black                                         | 1.19 | (1.1, 1.2) |
| Hispanic                                                   | 0.89 | (0.8, 0.9) |
| Asian/Pacific Islander                                     | 0.53 | (0.5, 0.6) |
| Other                                                      | 0.81 | (0.7, 0.9) |
| Insurance type (ref: private)                              |      |            |
| Medicaid                                                   | 1.48 | (1.4, 1.5) |
| Self-pay                                                   | 1.15 | (1.1, 1.2) |
| Other                                                      | 1.49 | (1.3, 1.6) |
| Disposition at index visit (ref: discharged home)          |      |            |
| Admitted                                                   | 0.87 | (0.8, 0.9) |
| Other                                                      | 0.95 | (0.8, 1.0) |
| Median income in patient ZIP code (ref: \$25,000-\$49,999) |      |            |
| <\$25,000                                                  | 0.85 | (0.8, 0.9) |
| \$50,000-\$74,999                                          | 1.00 | (1.0, 1.0) |
| \$75,000-\$99,999                                          | 0.93 | (0.8, 1.0) |
| ≥\$100,000                                                 | 0.73 | (0.6, 0.9) |
| Patient ED utilization, 2006-09                            |      |            |
| Total visits, mean ± SD                                    | 1.13 | (1.1, 1.1) |
| Any mental health visit                                    | 1.16 | (1.1, 1.2) |
| Any substance use visit                                    | 1.01 | (0.9, 1.1) |
| Dispersion parameter                                       | 1.27 | (1.2, 1.3) |

---

**Supplement Table 13. Full model results for analyses of subsequent total inpatient admissions among self-harm vs. psychiatric patients.**

---

|                                          | IRR <sub>adj</sub> | 95% CI     |
|------------------------------------------|--------------------|------------|
| Self-harm patient group                  | 1.12               | (1.0, 1.1) |
| Age                                      | 1.02               | (1.0, 1.0) |
| Race/ethnicity (ref: non-Hispanic White) |                    |            |
| Non-Hispanic Black                       | 1.29               | (1.2, 1.3) |
| Hispanic                                 | 0.90               | (0.8, 0.9) |



|                                                            |      |            |
|------------------------------------------------------------|------|------------|
| Asian/Pacific Islander                                     | 0.79 | (0.6, 0.9) |
| Other                                                      | 0.98 | (0.9, 1.0) |
| Insurance type (ref: private)                              |      |            |
| Medicaid                                                   | 1.35 | (1.3, 1.3) |
| Self-pay                                                   | 1.13 | (1.0, 1.1) |
| Other                                                      | 1.34 | (1.1, 1.3) |
| Disposition at index visit (ref: discharged home)          |      |            |
| Admitted                                                   | 1.76 | (1.7, 1.8) |
| Other                                                      | 1.21 | (1.0, 1.2) |
| Median income in patient ZIP code (ref: \$25,000-\$49,999) |      |            |
| <\$25,000                                                  | 1.03 | (0.9, 1.0) |
| \$50,000-\$74,999                                          | 0.97 | (0.9, 1.0) |
| \$75,000-\$99,999                                          | 0.99 | (0.9, 1.0) |
| ≥\$100,000                                                 | 0.87 | (0.7, 1.0) |
| Patient ED utilization, 2006-09                            |      |            |
| Total visits, mean ± SD                                    | 1.06 | (1.0, 1.1) |
| Any mental health visit                                    | 1.79 | (1.7, 1.8) |
| Any substance use visit                                    | 1.19 | (1.1, 1.2) |
| Dispersion parameter                                       | 2.24 | (2.1, 2.2) |

**Supplement Table 14. Full model results for analyses of subsequent inpatient admissions for psychiatric complaints among self-harm vs. psychiatric patients.**

|                                          | IRR <sub>adj</sub> | 95% CI     |
|------------------------------------------|--------------------|------------|
| Self-harm patient group                  | 1.14               | (1.0, 1.2) |
| Age                                      | 0.97               | (1.0, 1.0) |
| Race/ethnicity (ref: non-Hispanic White) |                    |            |
| Non-Hispanic Black                       | 1.35               | (1.2, 1.5) |
| Hispanic                                 | 0.74               | (0.7, 0.8) |

|                                                            |      |            |
|------------------------------------------------------------|------|------------|
| Asian/Pacific Islander                                     | 0.97 | (0.7, 1.3) |
| Other                                                      | 0.94 | (0.8, 1.1) |
| Insurance type (ref: private)                              |      |            |
| Medicaid                                                   | 1.44 | (1.3, 1.5) |
| Self-pay                                                   | 1.30 | (1.1, 1.5) |
| Other                                                      | 1.15 | (0.9, 1.4) |
| Disposition at index visit (ref: discharged home)          |      |            |
| Admitted                                                   | 2.47 | (2.3, 2.7) |
| Other                                                      | 1.37 | (1.1, 1.7) |
| Median income in patient ZIP code (ref: \$25,000-\$49,999) |      |            |
| <\$25,000                                                  | 1.14 | (0.9, 1.4) |
| \$50,000-\$74,999                                          | 1.05 | (0.9, 1.1) |
| \$75,000-\$99,999                                          | 1.11 | (0.9, 1.3) |
| ≥\$100,000                                                 | 1.02 | (0.7, 1.4) |
| Patient ED utilization, 2006-09                            |      |            |
| Total visits, mean ± SD                                    | 1.02 | (1.0, 1.0) |
| Any mental health visit                                    | 2.62 | (2.4, 2.9) |
| Any substance use visit                                    | 1.49 | (1.3, 1.7) |
| Dispersion parameter                                       | 5.30 | (5.0, 5.5) |

**Supplement Table 15. Full model results for analyses of subsequent inpatient admissions for non-psychiatric complaints among self-harm vs. psychiatric patients.**

|                                          | IRR <sub>adj</sub> | 95% CI     |
|------------------------------------------|--------------------|------------|
| Self-harm patient group                  | 1.17               | (1.1, 1.2) |
| Age                                      | 1.09               | (1.1, 1.1) |
| Race/ethnicity (ref: non-Hispanic White) |                    |            |
| Non-Hispanic Black                       | 1.15               | (1.0, 1.3) |
| Hispanic                                 | 1.06               | (1.0, 1.1) |

|                                                            |      |            |
|------------------------------------------------------------|------|------------|
| Asian/Pacific Islander                                     | 0.60 | (0.5, 0.7) |
| Other                                                      | 1.01 | (0.8, 1.0) |
| Insurance type (ref: private)                              |      |            |
| Medicaid                                                   | 1.21 | (1.1, 1.3) |
| Self-pay                                                   | 0.98 | (0.9, 1.1) |
| Other                                                      | 1.54 | (1.2, 1.9) |
| Disposition at index visit (ref: discharged home)          |      |            |
| Admitted                                                   | 1.11 | (1.0, 1.2) |
| Other                                                      | 1.01 | (0.8, 1.2) |
| Median income in patient ZIP code (ref: \$25,000-\$49,999) |      |            |
| <\$25,000                                                  | 1.03 | (0.8, 1.3) |
| \$50,000-\$74,999                                          | 0.90 | (0.8, 1.0) |
| \$75,000-\$99,999                                          | 0.87 | (0.8, 1.0) |
| ≥\$100,000                                                 | 0.70 | (0.5, 1.0) |
| Patient ED utilization, 2006-09                            |      |            |
| Total visits, mean ± SD                                    | 1.10 | (1.1, 1.1) |
| Any mental health visit                                    | 1.14 | (1.0, 1.2) |
| Any substance use visit                                    | 1.00 | (0.8, 1.0) |
| Dispersion parameter                                       | 2.42 | (2.2, 2.6) |

**Supplement Table 16. Full model results for analyses of subsequent total inpatient costs among self-harm vs. psychiatric patients.**

|                                          | Exp(b) <sup>a</sup> | 95% CI     |
|------------------------------------------|---------------------|------------|
| Self-harm patient group                  | 1.06                | (1.0, 1.1) |
| Age                                      | 1.01                | (1.0, 1.0) |
| Race/ethnicity (ref: non-Hispanic White) |                     |            |
| Non-Hispanic Black                       | 1.17                | (1.1, 1.2) |
| Hispanic                                 | 0.88                | (0.8, 1.0) |

|                                                            |      |            |
|------------------------------------------------------------|------|------------|
| Asian/Pacific Islander                                     | 0.97 | (0.8, 1.1) |
| Other                                                      | 1.02 | (0.9, 1.1) |
| Insurance type (ref: private)                              |      |            |
| Medicaid                                                   | 1.07 | (1.0, 1.1) |
| Self-pay                                                   | 1.06 | (0.9, 1.1) |
| Other                                                      | 1.23 | (1.0, 1.4) |
| Disposition at index visit (ref: discharged home)          |      |            |
| Admitted                                                   | 1.32 | (1.2, 1.4) |
| Other                                                      | 1.05 | (0.9, 1.0) |
| Median income in patient ZIP code (ref: \$25,000-\$49,999) |      |            |
| <\$25,000                                                  | 1.05 | (0.9, 1.2) |
| \$50,000-\$74,999                                          | 0.98 | (0.9, 1.0) |
| \$75,000-\$99,999                                          | 1.02 | (0.9, 1.0) |
| ≥\$100,000                                                 | 1.04 | (0.8, 1.3) |
| Patient ED utilization, 2006-09                            |      |            |
| Total visits, mean ± SD                                    | 1.02 | (1.0, 1.0) |
| Any mental health visit                                    | 1.40 | (1.3, 1.5) |
| Any substance use visit                                    | 1.12 | (1.0, 1.2) |

<sup>a</sup> Exp(b) is interpreted as the multiplicative effect on mean costs associated with being in the self-harm patient group vs. the control patient group.

**Supplement Table 17. Full model results for analyses of subsequent inpatient costs for psychiatric complaints among self-harm vs. psychiatric patients.**

|                                          | Exp(b) <sup>a</sup> | 95% CI     |
|------------------------------------------|---------------------|------------|
| Self-harm patient group                  | 1.09                | (1.0, 1.2) |
| Age                                      | 0.96                | (0.9, 1.0) |
| Race/ethnicity (ref: non-Hispanic White) |                     |            |
| Non-Hispanic Black                       | 1.27                | (1.1, 1.4) |
| Hispanic                                 | 0.76                | (0.7, 0.8) |
| Asian/Pacific Islander                   | 1.21                | (0.9, 1.6) |

|                                                                                                                                                                   |      |            |
|-------------------------------------------------------------------------------------------------------------------------------------------------------------------|------|------------|
| Other                                                                                                                                                             | 1.01 | (0.9, 1.0) |
| Insurance type (ref: private)                                                                                                                                     |      |            |
| Medicaid                                                                                                                                                          | 1.18 | (1.1, 1.3) |
| Self-pay                                                                                                                                                          | 1.25 | (1.0, 1.4) |
| Other                                                                                                                                                             | 0.92 | (0.7, 1.1) |
| Disposition at index visit (ref: discharged home)                                                                                                                 |      |            |
| Admitted                                                                                                                                                          | 1.81 | (1.7, 1.9) |
| Other                                                                                                                                                             | 1.16 | (0.9, 1.4) |
| Median income in patient ZIP code (ref: \$25,000-\$49,999)                                                                                                        |      |            |
| <\$25,000                                                                                                                                                         | 1.15 | (0.9, 1.4) |
| \$50,000-\$74,999                                                                                                                                                 | 1.06 | (1.0, 1.1) |
| \$75,000-\$99,999                                                                                                                                                 | 1.17 | (1.0, 1.3) |
| ≥\$100,000                                                                                                                                                        | 1.18 | (0.9, 1.5) |
| Patient ED utilization, 2006-09                                                                                                                                   |      |            |
| Total visits, mean ± SD                                                                                                                                           | 0.98 | (1.0, 1.0) |
| Any mental health visit                                                                                                                                           | 2.06 | (1.9, 2.2) |
| Any substance use visit                                                                                                                                           | 1.45 | (1.2, 1.6) |
| <sup>a</sup> Exp(b) is interpreted as the multiplicative effect on mean costs associated with being in the self-harm patient group vs. the control patient group. |      |            |

**Supplement Table 18. Full model results for analyses of subsequent inpatient costs for non-psychiatric complaints among self-harm vs. psychiatric patients.**

|                                          | Exp(b) <sup>a</sup> | 95% CI     |
|------------------------------------------|---------------------|------------|
| Self-harm patient group                  | 1.11                | (1.0, 1.2) |
| Age                                      | 1.08                | (1.0, 1.1) |
| Race/ethnicity (ref: non-Hispanic White) |                     |            |
| Non-Hispanic Black                       | 0.99                | (0.9, 1.1) |
| Hispanic                                 | 1.00                | (0.9, 1.1) |
| Asian/Pacific Islander                   | 0.72                | (0.6, 1.0) |
| Other                                    | 0.99                | (0.8, 1.2) |

|                                                            |      |            |
|------------------------------------------------------------|------|------------|
| Insurance type (ref: private)                              |      |            |
| Medicaid                                                   | 0.94 | (0.8, 1.0) |
| Self-pay                                                   | 0.88 | (0.7, 1.0) |
| Other                                                      | 1.52 | (1.1, 2.0) |
| Disposition at index visit (ref: discharged home)          |      |            |
| Admitted                                                   | 0.83 | (0.7, 0.9) |
| Other                                                      | 0.89 | (0.7, 1.0) |
| Median income in patient ZIP code (ref: \$25,000-\$49,999) |      |            |
| <\$25,000                                                  | 1.17 | (0.8, 1.6) |
| \$50,000-\$74,999                                          | 0.93 | (0.8, 1.0) |
| \$75,000-\$99,999                                          | 0.90 | (0.8, 1.0) |
| ≥\$100,000                                                 | 0.86 | (0.6, 1.2) |
| Patient ED utilization, 2006-09                            |      |            |
| Total visits, mean ± SD                                    | 1.07 | (1.1, 1.1) |
| Any mental health visit                                    | 0.91 | (0.8, 1.0) |
| Any substance use visit                                    | 0.89 | (0.8, 1.0) |

---

<sup>a</sup> Exp(b) is interpreted as the multiplicative effect on mean costs associated with being in the self-harm patient group vs. the control patient group.

---
